# Supplementary material
Source: PubMed Central journal article supplement (PMC4294490)
Supplement: supp_M114.589838_jbc.M114.589838-1.pdf [file supp_M114.589838_jbc.M114.589838-1.pdf]

# MEF2 Transcription Factors Regulate Distinct Gene Programs in Mammalian Skeletal Muscle Differentiation\*

Nelsa L. Estrella<sup>1</sup>, Cody A. Desjardins<sup>1</sup>, Sarah E. Nocco<sup>1</sup>, Amanda L. Clark<sup>1</sup>, Yevgeniy Maksimenko<sup>1</sup>, and Francisco J. Naya<sup>1</sup>

## **SUPPLEMENTAL FIGURE LEGENDS**

**SUPPLEMENTAL TABLE 1.** KEGG pathway analysis of gene sets sensitive to individual MEF2 isoforms.

**SUPPLEMENTAL TABLE 2.** Gene Ontology term analysis of gene sets sensitive to individual MEF2 isoforms.

**SUPPLEMENTAL TABLE 3.** Compilation of all overlapping transcription factor binding motifs identified in the Genomatix analysis. Each motif is listed under the relevant overlapping group of significantly overlapping isoforms and a Z-score for each relevant MEF2 isoform is provided. The Z-score threshold for significance is set at greater than or equal to 2. Additionally, characterized binding factors and their binding domains is also provided for each binding motif.

**Estrella\_SupTable1**

| <b>Term</b>                                | <b>Count</b> | <b>%</b> | <b>p-value</b> | <b>Fold Enrichment</b> |
|--------------------------------------------|--------------|----------|----------------|------------------------|
| <b>MEF2A</b>                               |              |          |                |                        |
| mmu04142:Lysosome                          | 43           | 1.33     | 5.91E-08       | 2.33                   |
| mmu04115:p53 signaling pathway             | 25           | 0.77     | 5.47E-05       | 2.34                   |
| mmu04520:Adherens junction                 | 25           | 0.77     | 3.02E-04       | 2.13                   |
| mmu05410:Hypertrophic cardiomyopathy (HCM) | 26           | 0.80     | 6.24E-04       | 2.00                   |
| mmu05212:Pancreatic cancer                 | 23           | 0.71     | 8.81E-04       | 2.06                   |
| <b>MEF2B</b>                               |              |          |                |                        |
| mmu05200:Pathways in cancer                | 6            | 4.76     | 3.55E-02       | 3.13                   |
| mmu04920:Adipocytokine signaling pathway   | 3            | 2.38     | 5.62E-02       | 7.56                   |
| mmu03320:PPAR signaling pathway            | 3            | 2.38     | 7.51E-02       | 6.41                   |
| <b>MEF2C</b>                               |              |          |                |                        |
| mmu04630:Jak-STAT signaling pathway        | 5            | 5.05     | 5.17E-03       | 6.74                   |
| mmu00590:Arachidonic acid metabolism       | 3            | 3.03     | 5.75E-02       | 7.41                   |
| mmu05222:Small cell lung cancer            | 3            | 3.03     | 5.99E-02       | 7.23                   |
| mmu05200:Pathways in cancer                | 5            | 5.05     | 6.22E-02       | 3.17                   |
| <b>MEF2D</b>                               |              |          |                |                        |
| mmu03018:RNA degradation                   | 2            | 7.14     | 7.10E-02       | 23.91                  |

## Estrella\_SuppTable2

| GO Term                                                              | Count | %     | p-value  | Fold Enrichment |
|----------------------------------------------------------------------|-------|-------|----------|-----------------|
| <b>MEF2A</b>                                                         |       |       |          |                 |
| <i>Biological Process</i>                                            |       |       |          |                 |
| GO:0006793~phosphorus metabolic process                              | 215   | 6.65  | 2.10E-11 | 1.53            |
| GO:0006796~phosphate metabolic process                               | 215   | 6.65  | 2.10E-11 | 1.53            |
| GO:0016310~phosphorylation                                           | 183   | 5.66  | 8.30E-11 | 1.57            |
| GO:0006468~protein amino acid phosphorylation                        | 167   | 5.16  | 8.92E-11 | 1.61            |
| GO:0046907~intracellular transport                                   | 119   | 3.68  | 1.83E-09 | 1.70            |
| <i>Cellular Component</i>                                            |       |       |          |                 |
| GO:0031974~membrane-enclosed lumen                                   | 288   | 8.91  | 1.82E-16 | 1.56            |
| GO:0005739~mitochondrion                                             | 315   | 9.74  | 3.73E-16 | 1.52            |
| GO:0043233~organelle lumen                                           | 274   | 8.47  | 9.38E-15 | 1.54            |
| GO:0070013~intracellular organelle lumen                             | 272   | 8.41  | 2.21E-14 | 1.53            |
| GO:0005856~cytoskeleton                                              | 258   | 7.98  | 1.85E-11 | 1.47            |
| <i>Molecular Function</i>                                            |       |       |          |                 |
| GO:0005524~ATP binding                                               | 356   | 11.01 | 1.26E-19 | 1.54            |
| GO:0032559~adenyl ribonucleotide binding                             | 358   | 11.07 | 2.81E-19 | 1.53            |
| GO:0030554~adenyl nucleotide binding                                 | 367   | 11.35 | 6.99E-18 | 1.49            |
| GO:0001883~purine nucleoside binding                                 | 369   | 11.41 | 9.22E-18 | 1.49            |
| GO:0001882~nucleoside binding                                        | 370   | 11.44 | 1.54E-17 | 1.48            |
| <b>MEF2B</b>                                                         |       |       |          |                 |
| <i>Biological Process</i>                                            |       |       |          |                 |
| GO:0048514~blood vessel morphogenesis                                | 9     | 7.14  | 3.85E-05 | 7.02            |
| GO:0001568~blood vessel development                                  | 9     | 7.14  | 1.66E-04 | 5.70            |
| GO:0001944~vasculature development                                   | 9     | 7.14  | 1.96E-04 | 5.56            |
| GO:0007389~pattern specification process                             | 9     | 7.14  | 4.62E-04 | 4.89            |
| GO:0060688~regulation of morphogenesis of a branching structure      | 4     | 3.17  | 5.27E-04 | 24.71           |
| <i>Cellular Component</i>                                            |       |       |          |                 |
| GO:0030018~Z disc                                                    | 3     | 2.38  | 3.02E-02 | 10.87           |
| GO:0031674~I band                                                    | 3     | 2.38  | 3.92E-02 | 9.44            |
| GO:0030017~sarcomere                                                 | 3     | 2.38  | 8.13E-02 | 6.25            |
| GO:0044449~contractile fiber part                                    | 3     | 2.38  | 9.20E-02 | 5.82            |
| GO:0042598~vesicular fraction                                        | 4     | 3.17  | 9.31E-02 | 3.66            |
| <i>Molecular Function</i>                                            |       |       |          |                 |
| GO:0043565~sequence-specific DNA binding                             | 10    | 7.94  | 6.59E-03 | 2.91            |
| GO:0016667~oxidoreductase activity, acting on sulfur group of donors | 3     | 2.38  | 1.71E-02 | 14.73           |
| GO:0003700~transcription factor activity                             | 11    | 8.73  | 1.92E-02 | 2.30            |
| GO:0030528~transcription regulator activity                          | 14    | 11.11 | 2.99E-02 | 1.88            |
| GO:0003677~DNA binding                                               | 17    | 13.49 | 6.96E-02 | 1.55            |
| <b>MEF2C</b>                                                         |       |       |          |                 |
| <i>Biological Process</i>                                            |       |       |          |                 |
| GO:0046456~icosanoid biosynthetic process                            | 3     | 3.03  | 6.27E-03 | 24.75           |
| GO:0006636~unsaturated fatty acid biosynthetic process               | 3     | 3.03  | 6.73E-03 | 23.87           |
| GO:0006690~icosanoid metabolic process                               | 3     | 3.03  | 9.82E-03 | 19.65           |
| GO:0033559~unsaturated fatty acid metabolic process                  | 3     | 3.03  | 1.10E-02 | 18.56           |
| GO:0030097~hemopoiesis                                               | 5     | 5.05  | 2.47E-02 | 4.44            |
| <i>Cellular Component</i>                                            |       |       |          |                 |
| GO:0005783~endoplasmic reticulum                                     | 11    | 11.11 | 9.67E-03 | 2.53            |
| GO:0005788~endoplasmic reticulum lumen                               | 3     | 3.03  | 5.24E-02 | 8.02            |
| GO:0044420~extracellular matrix part                                 | 3     | 3.03  | 8.05E-02 | 6.27            |

|                                                            |   |      |          |        |
|------------------------------------------------------------|---|------|----------|--------|
| GO:0005654~nucleoplasm                                     | 7 | 7.07 | 8.52E-02 | 2.25   |
| <i>Molecular Function</i>                                  |   |      |          |        |
| GO:0015093~ferrous iron transmembrane transporter activity | 2 | 2.02 | 1.46E-02 | 134.22 |
| GO:0005381~iron ion transmembrane transporter activity     | 2 | 2.02 | 3.38E-02 | 57.52  |
| GO:0008289~lipid binding                                   | 5 | 5.05 | 8.83E-02 | 2.92   |

## MEF2D

### *Biological Process*

|                                          |   |       |          |       |
|------------------------------------------|---|-------|----------|-------|
| GO:0022402~cell cycle process            | 5 | 17.86 | 1.22E-03 | 9.60  |
| GO:0000279~M phase                       | 4 | 14.29 | 4.90E-03 | 10.67 |
| GO:0007049~cell cycle                    | 5 | 17.86 | 6.03E-03 | 6.18  |
| GO:0022403~cell cycle phase              | 4 | 14.29 | 7.37E-03 | 9.21  |
| GO:0000087~M phase of mitotic cell cycle | 3 | 10.71 | 2.40E-02 | 11.67 |

### *Cellular Component*

none

### *Molecular Function*

|                                  |   |       |          |       |
|----------------------------------|---|-------|----------|-------|
| GO:0000287~magnesium ion binding | 4 | 14.29 | 1.20E-02 | 7.64  |
| GO:0030145~manganese ion binding | 3 | 10.71 | 1.33E-02 | 15.84 |

## Estrella\_SuppTable3

| TF Module  | Module Description                                           | Z-Score |      |      |   | Known Binding Factor                                                                                                                            | Binding Domain                      |
|------------|--------------------------------------------------------------|---------|------|------|---|-------------------------------------------------------------------------------------------------------------------------------------------------|-------------------------------------|
|            |                                                              | A       | B    | C    | D |                                                                                                                                                 |                                     |
| <b>A/B</b> |                                                              |         |      |      |   |                                                                                                                                                 |                                     |
| V\$AP1F    | AP1, Activating protein 1                                    | 3.56    | 2.41 |      |   | Batf, Fos, Fosl1, Jdp2, Junb, Batf3, Fosb, Fosl2, Jun, Jund                                                                                     | bZIP                                |
| V\$BPTF    | Bromodomain and PHD domain transcription factors             | 15.33   | 3.58 |      |   | Bptf                                                                                                                                            | not characterized                   |
| V\$CP2F    | CP2-erythrocyte Factor related to drosophila Elf1            | 5.38    | 2.17 |      |   | Tfcp2, Tfcp2l1, Ubp1                                                                                                                            | not characterized                   |
| V\$EREF    | Estrogen response elements                                   | 13.89   | 3.05 |      |   | Esr1, Esr2, Esrra, Esrrb, Esrrg                                                                                                                 | C4 zinc finger domain               |
| V\$GFI1    | Growth factor independence transcriptional repressor         | 12.73   | 2.09 |      |   | Gfi1, Gfi1b                                                                                                                                     | C2H2 zinc finger domain             |
| V\$GZF1    | GDNF-inducible zinc finger gene 1                            | 9.43    | 2.38 |      |   | Gzf1                                                                                                                                            | BTB-POZ C2H2 zinc fingers           |
| V\$HAND    | Twist subfamily of class B bHLH transcription factors        | 10.22   | 3.98 |      |   | Hand1, Lyl1, Mesp1, Mesp2, Nhlh1, Nhlh2, Scx, Tal1, Tal2, Tcf12, Tcf15, Tcf3, Tcf4, Twist1, Twist2                                              | bHLH                                |
| V\$HOXH    | HOX - MEIS1 heterodimers                                     | 6.78    | 2.48 |      |   | Hoxa10, Hoxa11, Hoxa13, Hoxa9, Hoxb13, Hoxb9, Hoxc10, Hoxc11, Hoxc12, Hoxc13, Hoxc9, Hoxd10, Hoxd11, Hoxd12, Hoxd13, Hoxd9, Meis1, Meis2, Meis3 | TALE class homeodomain, homeodomain |
| V\$PERO    | Peroxisome proliferator-activated receptor                   | 10.92   | 3.37 |      |   | Ppara, Ppard, Pparg, Rxra, Rxrb                                                                                                                 | C4 zinc finger domain               |
| V\$RP58    | RP58 (ZFP238) zinc finger protein                            | 10.62   | 3.91 |      |   | Zbtb18                                                                                                                                          | BTB-POZ C2H2 zinc fingers           |
| V\$TEAF    | TEA/ATTS DNA binding domain factors                          | 3.83    | 4.43 |      |   | Tead1, Tead2, Tead3, Tead4, Tulp1                                                                                                               | TEA/ATTS domain                     |
| V\$YY1F    | Activator/repressor binding to transcription initiation site | 7.32    | 2.87 |      |   | Yy1, Yy2, Zfp42                                                                                                                                 | C2H2 zinc finger domain             |
| V\$ZF11    | C2H2 zinc finger transcription factors 11                    | 11.69   | 2.22 |      |   | ZBTB3 (human)                                                                                                                                   | C2H2 zinc finger domain             |
| <b>A/C</b> |                                                              |         |      |      |   |                                                                                                                                                 |                                     |
| O\$INRE    | Core promoter initiator elements                             | 7.14    |      | 2.93 |   |                                                                                                                                                 |                                     |
| V\$AIRE    | Autoimmune regulatory element binding factor                 | 10.83   |      | 2.19 |   | Aire                                                                                                                                            | SAND domain, PHD domain             |

|         |                                                              |       |      |                                                                                                                               |                                     |
|---------|--------------------------------------------------------------|-------|------|-------------------------------------------------------------------------------------------------------------------------------|-------------------------------------|
| V\$CAAT | CCAAT binding factors                                        | 11.24 | 2.28 | Nfya, Nfyb, Nfyc                                                                                                              | heterotrimeric transcription factor |
| V\$CART | Cart-1 (cartilage homeoprotein 1)                            | 21.36 | 5.43 | Alx1, Alx3, Alx4, Arx, Esx1, Hesx1, Isx, Mixl1, Otp, Phox2a, Phox2b, Prop1, Prrx1, Prrx2, Rax, Rhox6, Shox2, Uncx, Vsx1, Vsx2 | homeodomain                         |
| V\$GUCE | GTF2IRDI upstream control element                            | 6.64  | 2.17 | Gtf2i, Gtf2ird1                                                                                                               | GTF2I repeat domain                 |
| V\$LTFM | Lactotransferrin motif                                       | 17.14 | 2.59 | Ltf                                                                                                                           | not characterized                   |
| V\$NBRE | NGFI-B response elements, nur subfamily of nuclear receptors | 3.66  | 2.96 | Nr4a1, Nr4a2, Nr4a3                                                                                                           | C4 zinc finger domain               |
| V\$NFAT | Nuclear factor of activated T-cells                          | 4.51  | 2.58 | Ilf2, Ilf3, Nfat5, Nfatc1, Nfatc2, Nfatc3, Nfatc4                                                                             | RHR                                 |
| V\$OSRF | Odd-skipped related factors                                  | 7.86  | 2.07 | Osr1, Osr2                                                                                                                    | C2H2 zinc finger domain             |
| V\$PAXH | PAX homeodomain binding sites                                | 8.24  | 2.16 | Pax4, Pax6, Pax7                                                                                                              | homeodomain                         |
| V\$PDX1 | Pancreatic and intestinal homeodomain transcription factor   | 10.18 | 2.13 | Pdx1                                                                                                                          | homeodomain, LIM domain/homeodomain |
| V\$PLZF | C2H2 zinc finger protein PLZF                                | 20.33 | 5.87 | Zbtb16, Zbtb32                                                                                                                | BTB-POZ C2H2 zinc fingers           |
| V\$PRDF | Positive regulatory domain I binding factor                  | 4.01  | 2.47 | Prdm1                                                                                                                         | C2H2 zinc finger domain             |
| V\$SIXF | Sine oculis (SIX) homeodomain factors                        | 14.23 | 3.52 | Six1-6                                                                                                                        | homeodomain, SIX domain             |
| V\$SNAP | snRNA-activating protein complex                             | 11.4  | 3.55 | Snopc4                                                                                                                        | MYB domain                          |

#### A/D

|         |                                                       |       |      |                                                                                                          |                         |
|---------|-------------------------------------------------------|-------|------|----------------------------------------------------------------------------------------------------------|-------------------------|
| V\$BRAC | Brachyury gene, mesoderm developmental factor         | 5.75  | 4.08 | Eomes, Mga, T, Tbr1, Tbx1, Tbx10, Tbx15, Tbx18, Tbx19, Tbx2, Tbx20, Tbx21, Tbx22, Tbx3, Tbx4, Tbx5, Tbx6 | T-box                   |
| V\$CIZF | CAS interacting zinc finger protein                   | 4.2   | 2.51 | Zfp384                                                                                                   | C2H2 zinc finger domain |
| V\$PPAR | Peroxisome proliferator activated receptor homodimers | 12.71 | 2.59 | Pparg                                                                                                    | C4 zinc finger domain   |

#### B/C

none

#### B/D

none

#### C/D

none

| A/B/C   |                                                    |       |      |      |                                                                                   |                                 |
|---------|----------------------------------------------------|-------|------|------|-----------------------------------------------------------------------------------|---------------------------------|
| O\$VTBP | Vertebrate TATA binding protein factor             | 35.46 | 7.38 | 8.33 | Tbp, Tbp11, Tbp12                                                                 |                                 |
| V\$BCDF | Bicoid-like homeodomain transcription factors      | 32.91 | 3.9  | 5.26 | Crx, Dmbx1, Gsc, Gsc2, Otx1, Otx2, Pitx1, Pitx2, Pitx3                            | homeodomain                     |
| V\$CABL | C-abl DNA binding sites                            | 36.34 | 4.99 | 6.76 | Abl1                                                                              | proline-rich region             |
| V\$CHRF | Cell cycle regulators: Cell cycle homology element | 13.96 | 4.37 | 2.51 | Lin54                                                                             | not characterized               |
| V\$DMRT | DM domain-containing transcription factors         | 26.48 | 5.17 | 5.08 | Dmrt1, Dmrt2, Dmrt3, Dmrta1, Dmrta2, Dmrtb1, Dmrta1a, Dmrta1b, Dmrta1c1, Dmrta1c2 | DM domain                       |
| V\$FAST | FAST-1 SMAD interacting proteins                   | 16.54 | 2.66 | 2.96 | Foxh1                                                                             | fork head domain (winged helix) |
| V\$GCNR | Germ cell nuclear receptors                        | 26.01 | 2.39 | 2.36 | Nr6a1                                                                             | C4 zinc finger domain           |
| V\$GREF | Glucocorticoid responsive and related elements     | 25    | 3.25 | 3.05 | Ar, Nr3c1, Nr3c2, Pgr                                                             | C4 zinc finger domain           |
| V\$HAML | Human acute myelogenous leukemia factors           | 19.54 | 2.61 | 2.01 | Cbfa2t2, Cbfa2t3, Cbfb, Runx1, Runx1t1, Runx2, Runx3                              | Runt-domain                     |
| V\$HMTB | Human muscle-specific Mt binding site              | 16.7  | 4.48 | 4.77 | not characterized                                                                 | not characterized               |
| V\$IRFF | Interferon regulatory factors                      | 20.11 | 2.24 | 4.01 | Irf1, Irf2, Irf3, Irf4, Irf5, Irf6, Irf7, Irf8, Irf9, Stat1, Stat2                | IRF-HTH                         |
| V\$IRXF | Iroquois homeobox transcription factors            | 25.48 | 6.21 | 7.23 | Irx1, Irx2, Irx3, Irx4, Irx5, Irx6                                                | homeodomain                     |
| V\$LEFF | LEF1/TCF                                           | 19.81 | 3.08 | 5.2  | Lef1, Tcf7, Tcf7l1, Tcf7l2                                                        | HMG domain                      |
| V\$MEF2 | MEF2, myocyte-specific enhancer binding factor     | 22.64 | 4.68 | 7.08 | Mef2a, Mef2b, Mef2c, Mef2d, Myef2                                                 | MADS box                        |
| V\$MITF | Microphthalmia transcription factor                | 23.36 | 5.47 | 2.6  | Mitf, Tfe3, Tfeb, Tfec                                                            | bHLH-ZIP                        |
| V\$MYT1 | MYT1 C2HC zinc finger protein                      | 18.18 | 3.6  | 4.57 | Myt1, Myt1l, St18                                                                 | C2HC zinc finger domain         |
| V\$NKX1 | NK1 homeobox transcription factors                 | 10.18 | 3.55 | 2.53 | Nkx1-1, Nkx1-2, Osgin2                                                            | homeodomain                     |
| V\$NKX6 | NK6 homeobox transcription factors                 | 15.54 | 2.33 | 5.99 | Nkx6-1, Nkx6-2, Nkx6-3                                                            | homeodomain                     |
| V\$NKXH | NKX homeodomain factors                            | 20.49 | 3.86 | 4.72 | Nkx2-1, Nkx2-2, Nkx2-3, Nkx2-4, Nkx2-5, Nkx2-6, Nkx2-7, Nkx2-9, Nkx3-2            | homeodomain                     |
| V\$P53F | p53 tumor suppressor                               | 10.33 | 3.52 | 2.84 | Trp53, Trp63, Trp73                                                               | p53 domain                      |

|         |                                                                       |       |      |      |  |                                                                                       |                                                             |
|---------|-----------------------------------------------------------------------|-------|------|------|--|---------------------------------------------------------------------------------------|-------------------------------------------------------------|
| V\$PAX2 | PAX-2 binding sites                                                   | 12.49 | 2.01 | 3.2  |  | Pax2                                                                                  | paired box domain,<br>octapeptide,<br>truncated homeodomain |
| V\$PBXC | PBX - MEIS complexes                                                  | 3.45  | 2.61 | 2.71 |  | Meis1, Meis2, Meis3, Pbx1,<br>Pbx2, Pbx3, Pbx4, Pknox1,<br>Pknox2                     | TALE class homeodomain                                      |
| V\$RXRF | RXR heterodimer binding sites                                         | 18.45 | 4.69 | 5.43 |  | Nr1h2, Nr1h3, Nr1i2, Nr1i3,<br>Rara, Rarb, Rarg, Rxra, Rxrb,<br>Rxrg, Thra, Thrb, Vdr | C4 zinc finger domain                                       |
| V\$SAL1 | Spalt-like transcription factor 1                                     | 14.24 | 3.63 | 4.57 |  | Sall1                                                                                 | C2H2 zinc finger domain                                     |
| V\$STEM | Motif composed of binding sites for pluripotency or stem cell factors | 10.36 | 3.89 | 2.92 |  | Pou5f1, Sox2                                                                          | not characterized                                           |

#### A/B/D

|         |                                      |      |      |  |      |                   |                          |
|---------|--------------------------------------|------|------|--|------|-------------------|--------------------------|
| V\$CLOX | CLOX and CLOX homology (CDP) factors | 4.79 | 2.79 |  | 3.27 | Cphx1, Cux1, Cux2 | CUT repeats, homeodomain |
|---------|--------------------------------------|------|------|--|------|-------------------|--------------------------|

#### A/C/D

|         |                                           |       |  |      |      |                                          |                         |
|---------|-------------------------------------------|-------|--|------|------|------------------------------------------|-------------------------|
| V\$EVI1 | EVI1-myleoid transforming protein         | 17.32 |  | 7.01 | 3.67 | Bcl11a, Bcl11b, Mecom,<br>Prdm16, Zfp521 | C2H2 zinc finger domain |
| V\$PARF | PAR/bZIP family                           | 15.68 |  | 3.65 | 2.62 | Dbp, Hlf, Tef, Vbp1                      | PAR/bZIP family         |
| V\$ZF03 | C2H2 zinc finger transcription factors 3  | 8.12  |  | 3.45 | 2.38 | Zfp217                                   | C2H2 zinc finger domain |
| V\$ZF10 | C2H2 zinc finger transcription factors 10 | 8.25  |  | 2.19 | 2.28 | Prdm14                                   | C2H2 zinc finger domain |

#### B/C/D

#### A/B/C/D

|         |                                                    |       |       |       |      |                                                                                                                                           |                           |
|---------|----------------------------------------------------|-------|-------|-------|------|-------------------------------------------------------------------------------------------------------------------------------------------|---------------------------|
| O\$PTBP | Plant TATA binding protein factor                  | 25.73 | 11.48 | 8.13  | 2.61 |                                                                                                                                           |                           |
| O\$YTBP | Yeast TATA binding protein factor                  | 32.52 | 12.86 | 10.71 | 2.53 |                                                                                                                                           |                           |
| V\$ABDB | Abdominal-B type homeodomain transcription factors | 28.85 | 3.98  | 9.73  | 3.37 | Hoxa10, Hoxa11, Hoxa13,<br>Hoxa9, Hoxb13, Hoxb9,<br>Hoxc10, Hoxc11, Hoxc12,<br>Hoxc13, Hoxc9, Hoxd10,<br>Hoxd11, Hoxd12, Hoxd13,<br>Hoxd9 | homeodomain               |
| V\$ARID | AT rich interactive domain factor                  | 15.59 | 2.37  | 6.34  | 3.1  | Arid3a, Arid3b, Arid5a,<br>Arid5b, Jarid2                                                                                                 | ARID domain               |
| V\$BCL6 | POZ domain zinc finger expressed in B-Cells        | 19.86 | 3.84  | 2.47  | 2.11 | Bcl6, Bcl6b                                                                                                                               | BTB-POZ C2H2 zinc fingers |
| V\$BRN5 | Brn-5 POU domain factors                           | 23.48 | 4.48  | 6.22  | 2.74 | Pou6f1, Pou6f2                                                                                                                            | POU domain                |



|         |                                               |       |       |       |      |                                                                                                                                                                                                                                                                                            |                                 |
|---------|-----------------------------------------------|-------|-------|-------|------|--------------------------------------------------------------------------------------------------------------------------------------------------------------------------------------------------------------------------------------------------------------------------------------------|---------------------------------|
| V\$BRNF | Brn POU domain factors                        | 31.08 | 4.27  | 9.59  | 3.79 | Pou3f1, Pou3f2, Pou3f4, Pou4f1, Pou4f2, Pou4f3                                                                                                                                                                                                                                             | POU domain                      |
| V\$CDXF | Vertebrate caudal related homeodomain protein | 22.98 | 3.95  | 5.62  | 3.21 | Cdx1, Cdx2, Cdx4                                                                                                                                                                                                                                                                           | homeodomain                     |
| V\$CEBP | Ccaat/Enhancer Binding Protein                | 7.81  | 2.66  | 2.71  | 2.19 | Cebpa, Cebpb, Cebpd, Cebpe, Cebpg, Cebpz                                                                                                                                                                                                                                                   | bZIP                            |
| V\$FKHD | Fork head domain factors                      | 60.68 | 10.67 | 11.25 | 5.29 | Ap5z1, Foxa1, Foxa2, Foxa3, Foxb1, Foxb2, Foxc1, Foxc2, Foxd1, Foxd2, Foxd3, Foxd4, Foxe1, Foxe3, Foxf1, Foxf2, Foxg1, Foxi1, Foxj1, Foxj2, Foxj3, Foxk1, Foxk2, Foxl1, Foxl2, Foxm1, Foxn2, Foxn3, Foxo1, Foxo3, Foxo4, Foxo6, Foxp1, Foxp2, Foxp3, Foxp4, Foxq1, Foxs1, Hfh5, Hfh6, Hfh7 | fork head domain (winged helix) |
| V\$GABF | GA-boxes                                      | 53.93 | 8.62  | 17.91 | 6.36 | not characterized                                                                                                                                                                                                                                                                          | not characterized               |
| V\$GATA | GATA binding factors                          | 21.67 | 3.88  | 5.58  | 3.04 | Gata1, Gata2, Gata3, Gata4, Gata5, Gata6, Trps1                                                                                                                                                                                                                                            | GATA-C2C2 zinc finger domain    |
| V\$HBOX | Homeobox transcription factors                | 17    | 2.56  | 3.98  | 2.75 | Emx2, En1, En2, Evx1, Evx2, Gbx1, Gbx2, Gsx1, Gsx2, Meox1, Meox2, Mnx1, Vax1, Vax2                                                                                                                                                                                                         | homeodomain                     |
| V\$HNF1 | Hepatic Nuclear Factor 1                      | 23.19 | 5.85  | 6.14  | 2.43 | Hmbox1, Hnf1a, Hnf1b                                                                                                                                                                                                                                                                       | homeodomain                     |
| V\$HNF6 | Onecut homeodomain factor HNF6                | 16.09 | 3.26  | 6.64  | 2.08 | Onecut1, Onecut2, Onecut3                                                                                                                                                                                                                                                                  | CUT repeats, homeodomain        |
| V\$HOMF | Homeodomain transcription factors             | 30.98 | 3.7   | 6.13  | 3.28 | Barhl1, Barhl2, Barx1, Barx2, Bsx, Hhex, Hmx1, Hmx2, Hmx3, Lbx2, Msx1, Msx2, Msx3, Nobox, Tlx1, Tlx2                                                                                                                                                                                       | homeodomain                     |

|         |                                                                            |       |      |      |      |                                                                                                                                                                                                                                                    |                                              |
|---------|----------------------------------------------------------------------------|-------|------|------|------|----------------------------------------------------------------------------------------------------------------------------------------------------------------------------------------------------------------------------------------------------|----------------------------------------------|
| V\$HOXC | HOX - PBX complexes                                                        | 34.97 | 9.23 | 8.61 | 5.25 | Hoxa1, Hoxa10, Hoxa2, Hoxa3, Hoxa4, Hoxa5, Hoxa6, Hoxa7, Hoxa9, Hoxb1, Hoxb2, Hoxb3, Hoxb4, Hoxb5, Hoxb6, Hoxb7, Hoxb8, Hoxb9, Hoxc10, Hoxc4, Hoxc5, Hoxc6, Hoxc8, Hoxc9, Hoxd1, Hoxd10, Hoxd3, Hoxd4, Hoxd8, Hoxd9, Meis1, Pbx1, Pbx2, Pbx3, Pbx4 | TALE class homeodomain, homeodomain          |
| V\$HOXF | Paralog hox genes 1-8 from the four hox clusters A, B, C, D                | 23.43 | 3.82 | 7.15 | 2.94 | Hoxa1, Hoxa2, Hoxa3, Hoxa4, Hoxa5, Hoxa6, Hoxa7, Hoxb1, Hoxb2, Hoxb3, Hoxb4, Hoxb5, Hoxb6, Hoxb7, Hoxb8, Hoxc4, Hoxc5, Hoxc6, Hoxc8, Hoxd1, Hoxd3, Hoxd4, Hoxd8, Nanog                                                                             | homeodomain                                  |
| V\$LHXF | Lim homeodomain factors                                                    | 23.8  | 4.26 | 7.12 | 2.51 | Isl1, Isl2, Lhx1, Lhx2, Lhx3, Lhx4, Lhx5, Lhx6, Lhx8, Lhx9, Lmx1a, Lmx1b                                                                                                                                                                           | LIM domain/homeodomain                       |
| V\$NR2F | Nuclear receptor subfamily 2 factors                                       | 21.83 | 3.98 | 3.11 | 2.33 | Hnf4a, Hnf4g, Nr2c1, Nr2c2, Nr2e3, Nr2f1, Nr2f2, Nr2f6                                                                                                                                                                                             | C4 zinc finger domain                        |
| V\$OCT1 | Octamer binding protein                                                    | 22.15 | 4.35 | 7.13 | 4.17 | Pou2f1, Pou2f2, Pou2f3, Pou3f3                                                                                                                                                                                                                     | POU domain                                   |
| V\$PAX6 | PAX-4/PAX-6 paired domain binding sites                                    | 19.98 | 2.97 | 2.11 | 2.24 | Pax4, Pax6                                                                                                                                                                                                                                         | paired box domain, homeodomain               |
| V\$PIT1 | GHF-1 pituitary specific pou domain transcription factor                   | 28.03 | 5.7  | 8.74 | 4.79 | Pou1f1                                                                                                                                                                                                                                             | POU domain                                   |
| V\$RORA | v-ERB and RAR-related orphan receptor alpha                                | 15.84 | 4.35 | 3.07 | 2.23 | Nr1d1, Nr1d2, Rora, Rorb, Rorc                                                                                                                                                                                                                     | C4 zinc finger domain                        |
| V\$RUSH | SWI/SNF related nucleophosphoproteins with a RING finger DNA binding motif | 24.56 | 4.21 | 5.52 | 2.08 | Hltf                                                                                                                                                                                                                                               | not characterized                            |
| V\$SATB | Special AT-rich sequence binding protein                                   | 17.33 | 2.71 | 3.61 | 2.11 | Satb1, Satb2                                                                                                                                                                                                                                       | MAR-binding domain, CUT repeats, homeodomain |
| V\$SIX3 | Sine oculis homeobox homolog 3                                             | 36.92 | 3.21 | 3.9  | 3    | Six3, Six6                                                                                                                                                                                                                                         | homeodomain                                  |

|         |                                                           |       |      |      |      |                                                                                                                                                                                    |                     |
|---------|-----------------------------------------------------------|-------|------|------|------|------------------------------------------------------------------------------------------------------------------------------------------------------------------------------------|---------------------|
| V\$SORY | SOX/SRY-sex/testis determinig and related HMG box factors | 33.64 | 5.92 | 8.83 | 3.88 | Cic, Hbp1, Hmga1, Hmga2, Pinx1, Sox1, Sox10, Sox11, Sox12, Sox13, Sox14, Sox15, Sox16, Sox17, Sox18, Sox19, Sox2, Sox21, Sox3, Sox30, Sox4, Sox5, Sox6, Sox7, Sox8, Sox9, Sry, Tox | AT-hook, HMG domain |
| V\$SRFF | Serum response element binding factor                     | 23.26 | 5.04 | 4.36 | 2.28 | Srf                                                                                                                                                                                | MADS box            |
| V\$STAT | Signal transducer and activator of transcription          | 28.25 | 2.03 | 4.43 | 2.79 | Stat1, Stat2, Stat3, Stat4, Stat5a, Stat5b, Stat6                                                                                                                                  | STAT domain         |
